# Supplementary material for: Synthesis, characterization and testing of a new V2O5/Al2O3–MgO catalyst for butane dehydrogenation and limonene oxidation
Source: Royal Society of Chemistry journal article supplement (doi:10.1039/c3dt32954b), 2013-01-01
Supplement: c3dt32954b.pdf [file c3dt32954b.pdf]

## Supporting information for the article:

### Synthesis, characterization and testing of a new $V_2O_5/Al_2O_3-MgO$ catalyst for butane dehydrogenation and limonene oxidation.

Zea Strassberger, Enrique V. Ramos-Fernandez, Agnes Boonstra, Remy Jorna, Stefania Tanase\* and Gadi Rothenberg\*

*Van't Hoff Institute for Molecular Sciences  
University of Amsterdam  
Science Park 904, 1098, XH, Amsterdam, The Netherlands  
Fax: (+)31 (0) 20 525 5604  
E-mail: [s.grecea@uva.nl](mailto:s.grecea@uva.nl), [g.rothenberg@uva.nl](mailto:g.rothenberg@uva.nl)*

This file includes the IR studies of the bare support, catalysts **A** and **B**, the XRD pattern of catalysts **A-C**, the EPR studies are presented for catalyst **A** and **B** at 298 K and for catalyst **A** at 20 K and 70 K as well as the reduced catalyst **A** at 298 K. We also include the TPR profile of vanadium pentoxide and the experimental procedure for performing the leaching tests.

#### 1. IR Studies

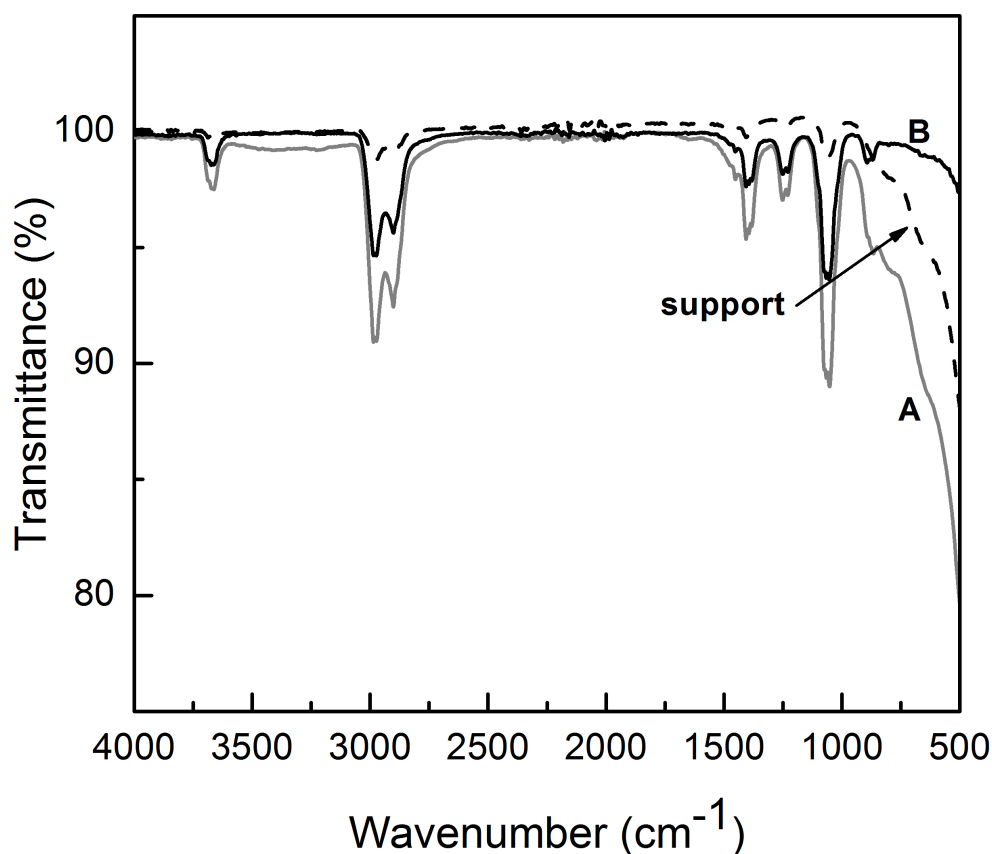

Figure S1: IR spectra of the support and the catalysts **A** and **B**.

## 2. XRD studies

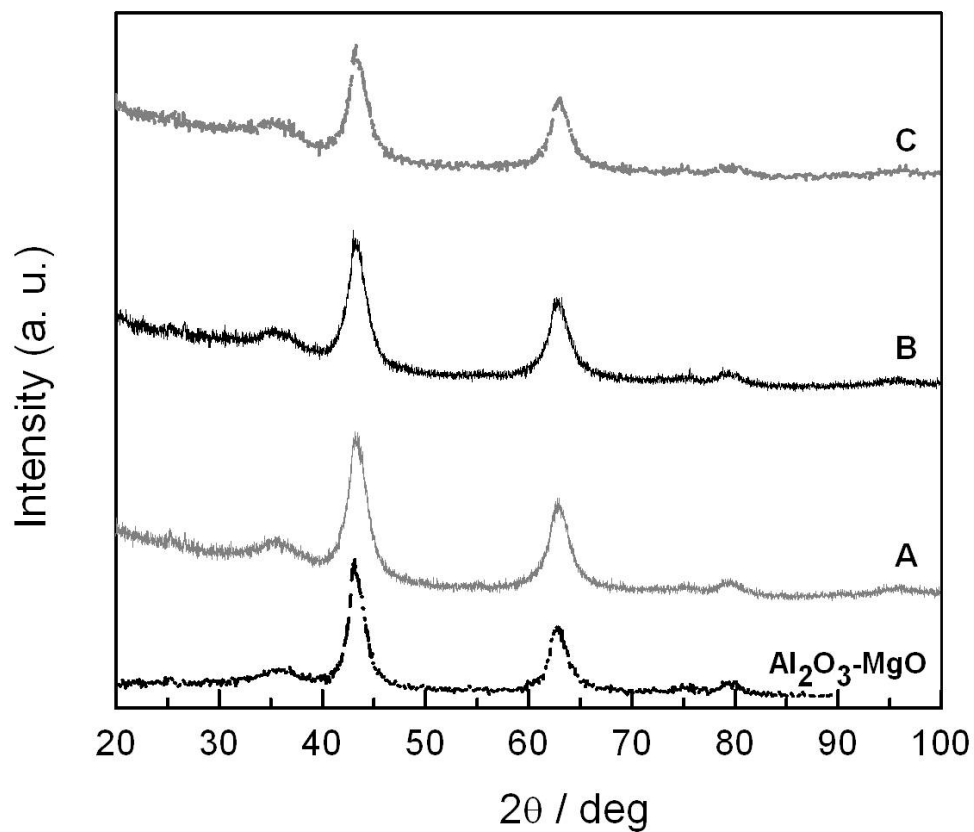

Figure S2: X-ray diffraction patterns of catalysts A-C

Al<sub>2</sub>O<sub>3</sub>- MgO: XRD pattern for the bare support

A) XRD pattern for catalyst **A**: 5 wt% V<sub>2</sub>O<sub>5</sub> on MgO–Al<sub>2</sub>O<sub>3</sub> support

B) XRD pattern for catalyst **B**: 10 wt% V<sub>2</sub>O<sub>5</sub> on MgO–Al<sub>2</sub>O<sub>3</sub> support

C) XRD pattern for catalyst **C**: 15 wt% V<sub>2</sub>O<sub>5</sub> on MgO–Al<sub>2</sub>O<sub>3</sub> support

### 3. EPR studies

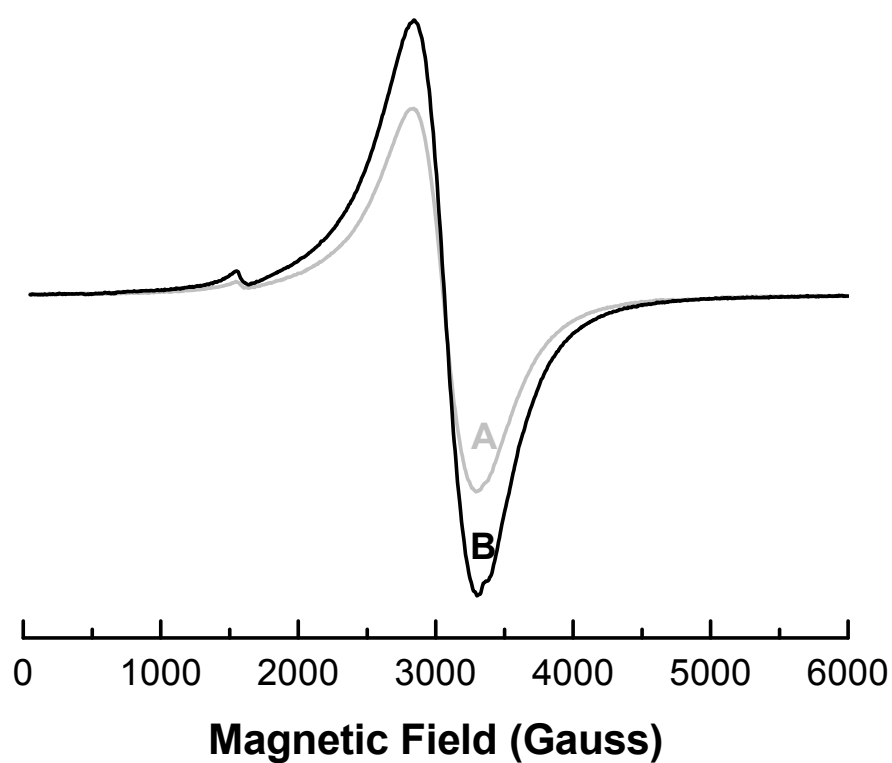

Figure S3: EPR spectra of catalysts **A** and **B** at 298 K.

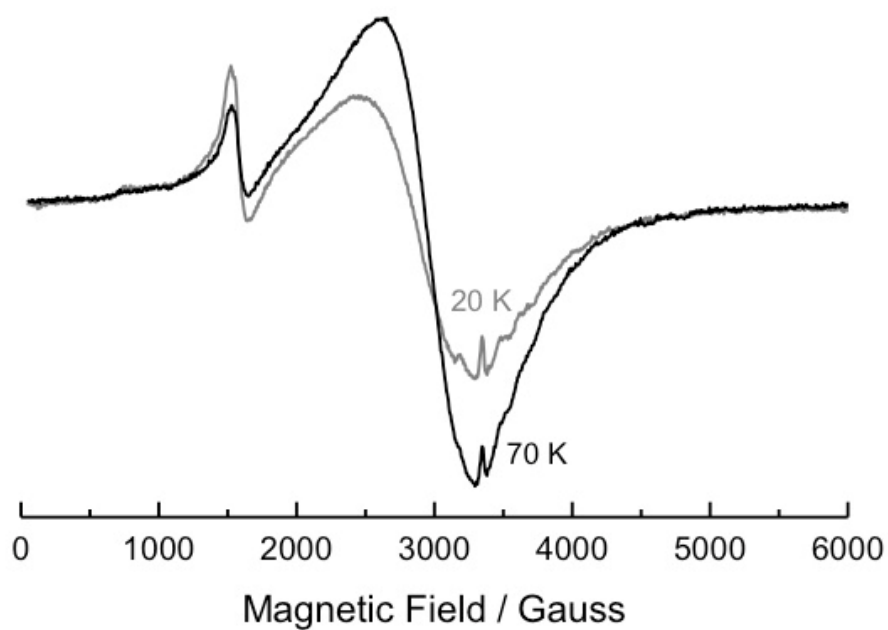

Figure S4: EPR spectra of catalyst **A** at 20 K and 70 K.

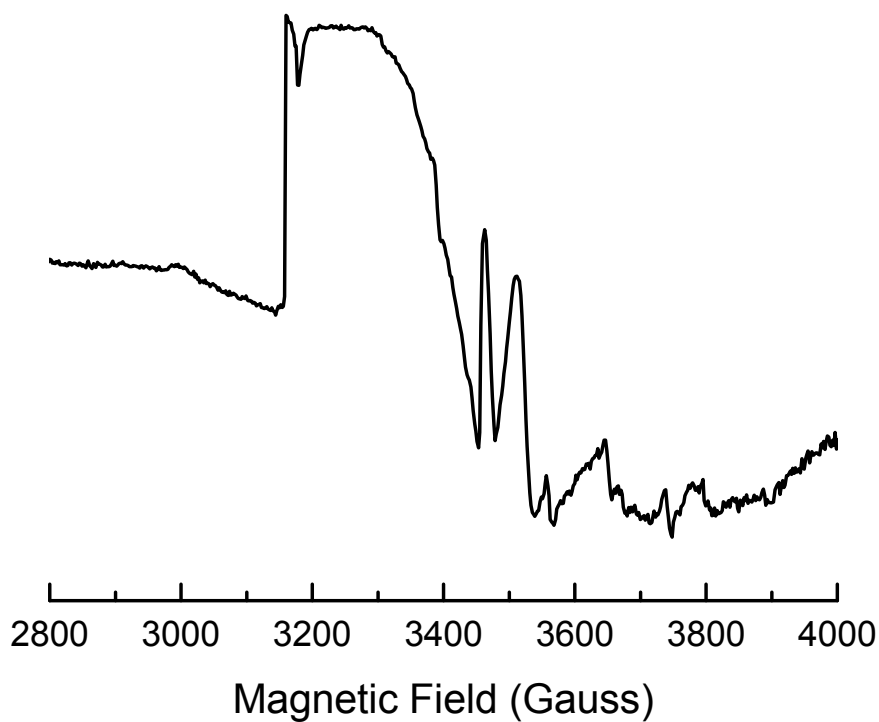

Figure S5: EPR spectrum of the reduced catalyst A recorded at 298 K, after keeping the catalyst two weeks at ambient conditions.

#### 4. TPR measurements

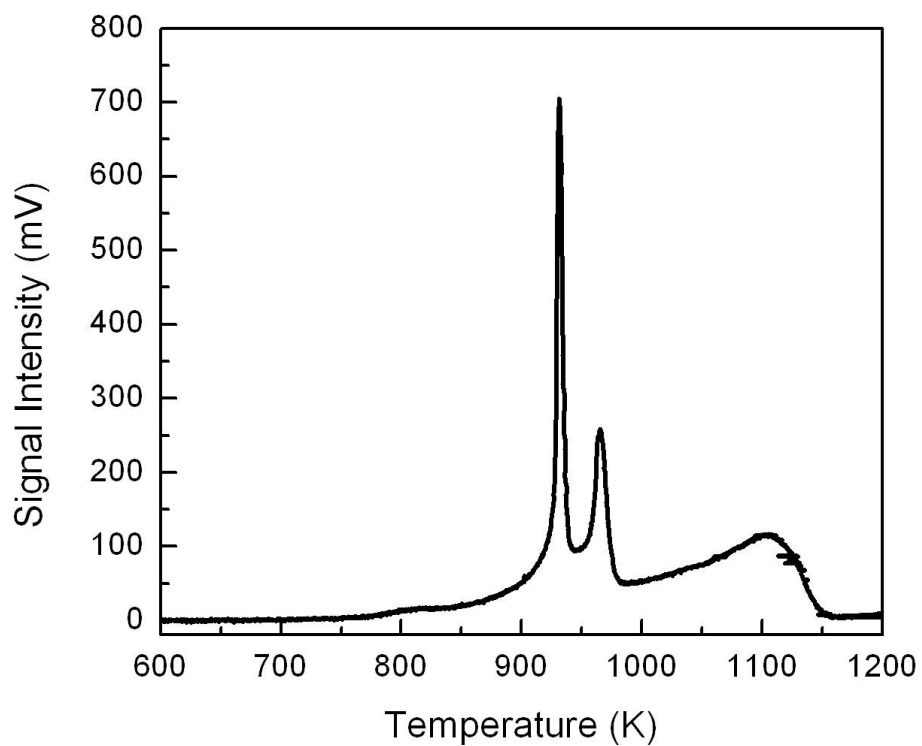

Figure S6: Temperature programmed reduction profile of  $V_2O_5$

### 5. Leaching test

The reaction conditions are : 1.2 ml (6.2 mmol) limonene, 6.0 ml H<sub>2</sub>O<sub>2</sub> (35.5, aq.; molar ratio 8:1 H<sub>2</sub>O<sub>2</sub>:limonene), 1.3 ml (12.4 mmol) benzonitrile; 0.025 g catalyst; 40 ml acetone:2-butanol (ratio 2:8), 65 °C, 6 h. The quantitative GC-analysis is performed using an external standard (anisole) calibration.

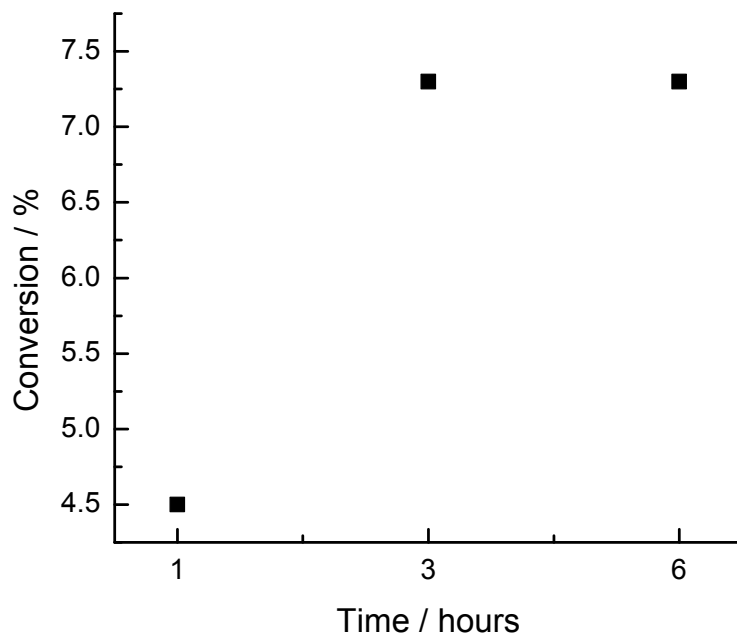

Figure S7: Leaching test of catalyst **B**. Catalyst is filtered off after 60 min reaction time.
